# Supplementary material for: Fabrication of a Cu(i)-carboxylate metal–organic framework by reduction of metal nodes for an azide–alkyne “click” reaction
Source: Royal Society of Chemistry journal article supplement (doi:10.1039/d4qi00922c), 2024-01-01
Supplement: d4qi00922c1.pdf [file d4qi00922c1.pdf]

## Supplementary Information

### Fabrication of Cu(I)-Carboxylate Metal-Organic Framework by Reduction of Metal Nodes for Azide-Alkyne “Click” Reaction

Xiaojiao Hou,<sup>a, b</sup> Wenxiu He,<sup>a</sup> Xu Zhai,<sup>a</sup> Bingbing Chen,<sup>a</sup> Yuanlin Fu,<sup>a</sup> Liying Zhang,<sup>a</sup> Junyi Chen<sup>\*c</sup> and Yu Fu<sup>\*a</sup>

- a. Department of Chemistry, College of Sciences, Northeastern University, Shenyang, 110819, P. R. China.
- b. Experimental Center, Liaodong University, Dandong, 118003, P. R. China.
- c. Engineering Laboratory of Chemical Resources Utilization in South Xinjiang, College of Chemistry and Chemical Engineering, Tarim University, Xinjiang Uygur Autonomous Region, Alaer, 843300, P. R. China.

\*Corresponding authors.

E-mail: fuyu@mail.neu.edu.cn (Yu Fu), sln5xn@163.com (Junyi Chen)

## Chemicals

Copper(II) acetate ( $\text{Cu}(\text{OAc})_2$ ), 2,5-dihydroxyterephthalic acid ( $\text{H}_4\text{DOBDC}$ ), acetonitrile (MeCN), *N,N*-Dimethylformamide (DMF), methanol, ascorbic acid (AA), and hydroquinone ( $\text{H}_2\text{Q}$ ) were purchased from Sinopharm Chemical Reagent Co., Ltd. All chemicals were used without further purification.

## Characterization

Morphological images of all samples were characterized by field-emission scanning electron microscopy (SEM, Hitachi SU8010) and transmission electron microscope (TEM, FEI Talos F200X). The crystallographic information was obtained by X-ray diffraction (XRD, Panalytical, Empyrean) equipped with a Cu  $K\alpha$  radiation source ( $\lambda=0.15406 \text{ \AA}$ ). The organic groups of the samples were characterized by Fourier transform infrared spectroscopy (FT-IR, Bruker VERTEX 70). Thermogravimetric analysis curves were obtained from a TGA thermogravimetric analyzer (PE STA8000) from 25 to 600 °C with a heating rate of 10 °C  $\text{min}^{-1}$  in air flow. The  $\text{N}_2$  adsorption-desorption isotherm was collected using a Surface Area and Porosimetry System (Autosorb-IQ-MP-C). The absorbance of the reducing solution was monitored by UV-vis spectra (Maya2000 Pro). The element content analysis was detected by an inductively coupled plasma spectrometer (ICP, PerkinElmer Avio 500). X-ray photoelectron spectroscopy (XPS) analysis was performed using an X-ray photoelectron spectrometer (Thermo Scientific K-Alpha). GC analysis was performed using a BEIFEN 3420A instrument equipped with a FID (flame ionization detector) and a KB-1701 column (30 m  $\times$  0.32 mm  $\times$  0.25  $\mu\text{m}$ ).  $^1\text{H}$  and  $^{13}\text{C}$  NMR spectra were measured on a Bruker 600 MHz NMR spectrometer.

## X-ray Absorption Spectroscopy Analysis

The extended X-ray absorption fine structure (EXAFS) measurements were carried out on the sample at 5S1 X-ray absorption beamline of Aichi Synchrotron Radiation Center. This beamline adopted a double-bounce channel-cut Si (111) monochromator for mono-beam X-ray absorption spectroscopy. The end-station is equipped with three ionization chambers and seven-elements SDD detector after the sample position for transmission and fluorescence mode X-ray absorption spectroscopy. The photon flux on the sample ranges from  $3 \times 10^{10} \sim 4 \times 10^{10}$  photon/sec for X-ray energy from 5 keV  $\sim$  9 keV in low energy mode. The photon flux on the sample ranges from  $1 \times 10^{11} \sim 2.2 \times 10^{10}$  photon/sec for X-ray energy from 7 keV  $\sim$  18 keV in normal energy mode. The photon flux on the sample ranges from  $2.3 \times 10^{10} \sim 5 \times 10^9$  photon/sec for X-ray energy from 17 keV  $\sim$  22 keV in high energy mode.

## Synthesis of the metastable $\text{CuH}_2\text{DOBDC}$ MOF

The 70 mM  $\text{Cu}(\text{OAc})_2$  solution and the 40 mM 2,5-dihydroxyterephthalic acid ( $\text{H}_4\text{DOBDC}$ ) solution were separately prepared using a mixed solvent of DMF and MeCN in a 2:1 volume ratio. Subsequently, 800  $\mu\text{L}$  of the  $\text{Cu}(\text{OAc})_2$  solution was gradually and dropwise into 4 mL of the  $\text{H}_4\text{DOBDC}$  solution in a glass culture dish while gently shaking. Following evaporation under conditions of room temperature and less than 30% humidity for 24 h, green block crystals were obtained. These crystals were washed with DMF and dried at room temperature.

## Reduction of $\text{CuH}_2\text{DOBDC}$ with different amounts of ascorbic acid

The obtained  $\text{CuH}_2\text{DOBDC}$  (0.1g, 0.2 mmol) was placed in a glass culture dish. In separate vials, we prepared ascorbic acid solutions by dissolving varying amounts of ascorbic acid (0.2, 0.6, 1.0, and 1.4 mmol) in 10 mL of DMF. Once the respective ascorbic acid solution was added to the glass culture dish containing  $\text{CuH}_2\text{DOBDC}$ , it was placed at room temperature for 24 h. Finally, the sample was washed three times with DMF and collected after vacuum freeze-drying.

### Reduction of Cu<sub>2</sub>H<sub>2</sub>DOBDC with different amounts of hydroquinone

The obtained Cu<sub>2</sub>H<sub>2</sub>DOBDC (0.1g, 0.2 mmol) was placed in a glass culture dish. In separate vials, we prepared hydroquinone solutions by dissolving varying amounts of hydroquinone (1.0, 2.0, 6.0, and 10.0 mmol) in 10 mL of DMF. Once the respective hydroquinone solution was added to the glass culture dish containing Cu<sub>2</sub>H<sub>2</sub>DOBDC, it was placed at room temperature for 24 h. Finally, the sample was washed three times with DMF and collected after vacuum freeze-drying.

### General Procedure for the CuAAC Reaction

A mixture consisting of azides (1 mmol), alkynes (2 mmol), amyl acetate (1 mmol), catalyst (10 mg), and acetonitrile (4 mL) was sealed in a 50 mL sample vial. The resulting mixture was stirred at 80°C. After completion of the reaction, the mixture was centrifuged to recover the catalyst. The recovered catalyst was washed with acetonitrile and methanol, dried, and reused in a subsequent reaction. Product yields were measured by GC, and the products were further confirmed by <sup>1</sup>H NMR and <sup>13</sup>C NMR spectra on a Bruker 600 MHz spectrometer using CDCl<sub>3</sub>.

### TGA analysis

The residual material was simply CuO under air atmosphere for the TGA test. Both physisorbed water molecules and solvent molecules within the pores cannot be precisely quantified stoichiometrically, whereas the loss of ligands can.<sup>1</sup> Based on FTIR spectroscopy results, it was observed that there is no evidence of DMF participating in the coordination environment of Cu<sub>2</sub>H<sub>2</sub>DOBDC. Consequently, we propose that the chemical formula of the final products is Cu<sub>x</sub>H<sub>2</sub>DOBDC (x > 1). Assuming a complete reduction of all Cu(II) in Cu<sub>2</sub>H<sub>2</sub>DOBDC to Cu(I), the stoichiometric ratio of Cu to H<sub>2</sub>DOBDC<sup>2-</sup> ligand would be 2, in accordance with the principle of valence balance. Therefore, we anticipate a weight loss, relative to this final step, of 50.62% based on the following equation.

$$\frac{M(\text{CuO})}{M(\text{Cu}_2\text{H}_2\text{DOBDC})} = \frac{160}{324} \times 100\% = 49.38\%$$

The experimental results revealed a relative weight loss of 49.09% (from 93.72% to 44.63% by weight). This experimental value is much closer to the theoretical value (50.62%), thus validating our proposed chemical formula.

### EA analysis

The EA results revealed that the content of C in Cu<sub>2</sub>H<sub>2</sub>DOBDC is 28.6%, thus confirming that the content of the ligand H<sub>4</sub>DOBDC is approximately 58.39%. The result is very close to the theoretical content of ligands (60.49%) in the Cu<sub>2</sub>H<sub>2</sub>DOBDC structure.

The EA results indicate that the N content in Cu<sub>2</sub>H<sub>2</sub>DOBDC is less than 0.1%.

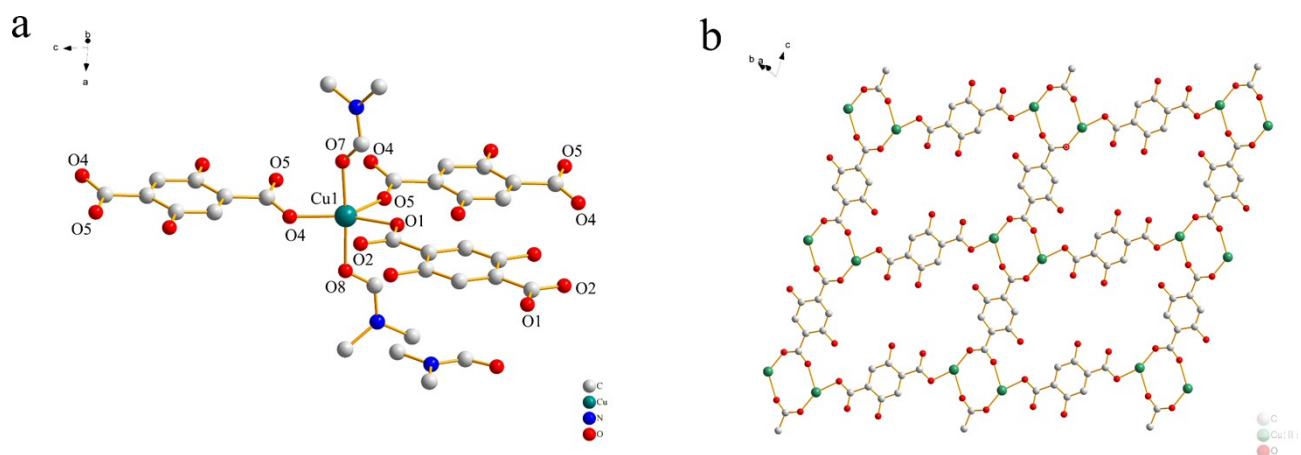

**Figure S1.** Crystal structure of  $\text{CuH}_2\text{DOBDC}$ . (a) The fundamental unit of  $\text{CuH}_2\text{DOBDC}$ . (b) The 2D layer structure of  $\text{CuH}_2\text{DOBDC}$ . All hydrogen atoms and DMF molecules are omitted for clarity.

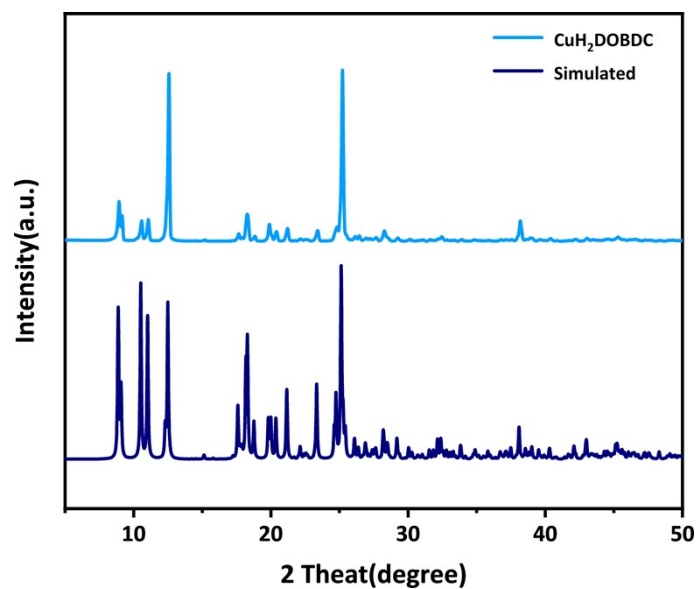

**Figure S2.** XRD patterns of the prepared metastable  $\text{CuH}_2\text{DOBDC}$  MOF and simulated  $\text{CuH}_2\text{DOBDC}$  MOF.

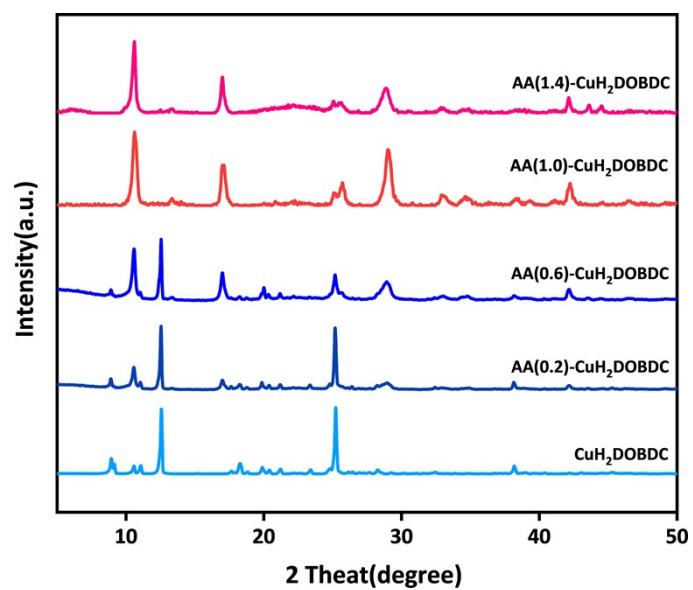

Figure S3. XRD patterns of samples synthesized by reduction of CuH<sub>2</sub>DOBDC with different amounts of ascorbic acid.

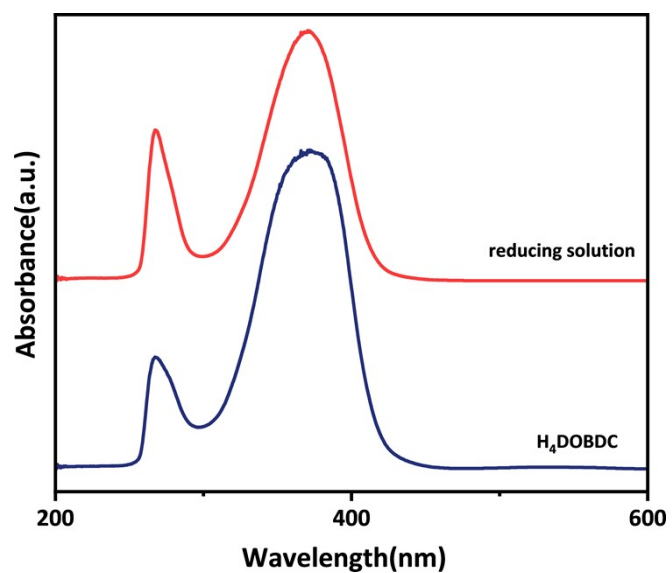

Figure S4. The UV-Vis absorption spectrum of CuH<sub>2</sub>DOBDC in an ascorbic acid reducing solution after 24 h.

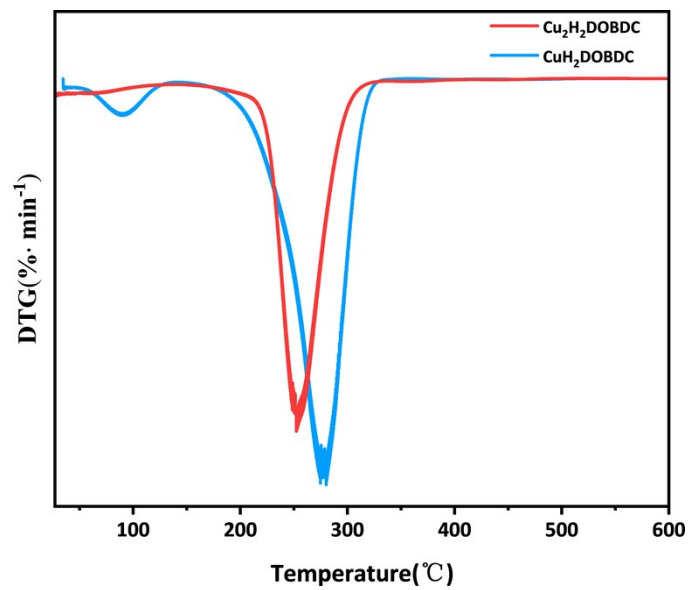

Figure S5. DTG curves of CuH<sub>2</sub>DOBDC and Cu<sub>2</sub>H<sub>2</sub>DOBDC.

a

Chelating

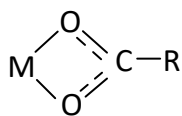

$$50 < \Delta < 150$$

Bridging

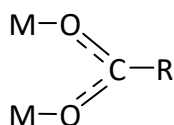

$$130 < \Delta < 200$$

Monodentate

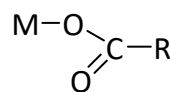

$$200 < \Delta$$

b

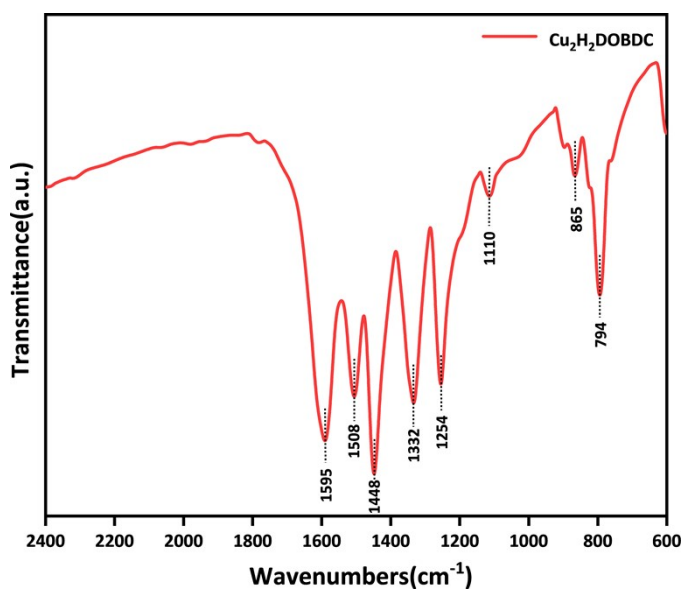

**Figure S6.** (a) Three coordination modes and corresponding  $\Delta$  values for carboxylate ion and metal (M). (b) FTIR spectrum of  $\text{Cu}_2\text{H}_2\text{DOBDC}$  and assignment of typical bands.

Consistent with previous studies in the literature,<sup>2-5</sup> FTIR bands for  $\text{Cu}_2\text{H}_2\text{DOBDC}$  are observed at 1595, 1508, 1448, 1332, 1254, 1110, 865, and 794  $\text{cm}^{-1}$ . The asymmetric stretch of the carboxylate group is present at 1595  $\text{cm}^{-1}$ , while the symmetric stretch is observed at 1332  $\text{cm}^{-1}$ . The other bands observed in  $\text{Cu}_2\text{H}_2\text{DOBDC}$  are as follows: 1508  $\text{cm}^{-1}$  is assigned to the ring vibrations of phenyl groups, 1448  $\text{cm}^{-1}$  corresponds to the in-plane OH deformation modes, 1254  $\text{cm}^{-1}$  is attributed to the C-OH combination band of a carboxylic acid, 1110  $\text{cm}^{-1}$  is assigned to the C-H in-plane bending modes, and the bands at 865 and 794  $\text{cm}^{-1}$  coincide with the C-C ring out-of-plane bending modes.

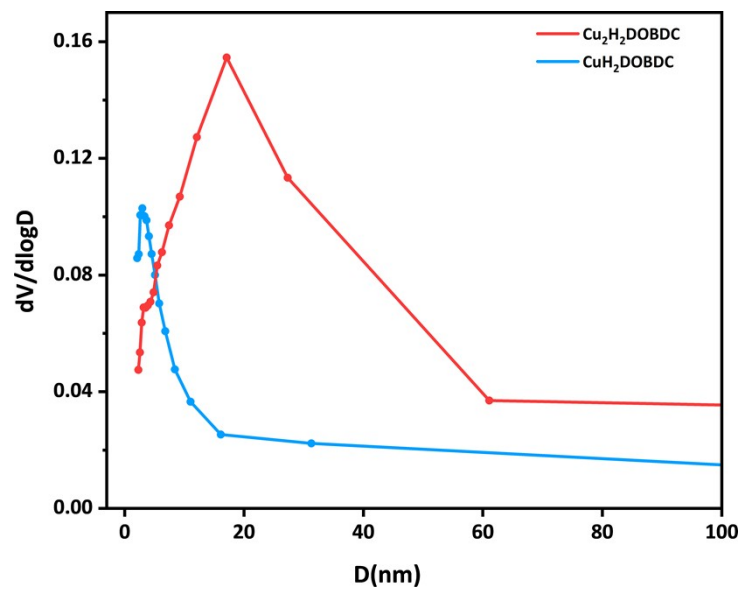

Figure S7. Pore size distributions of CuH<sub>2</sub>DOBDC and Cu<sub>2</sub>H<sub>2</sub>DOBDC.

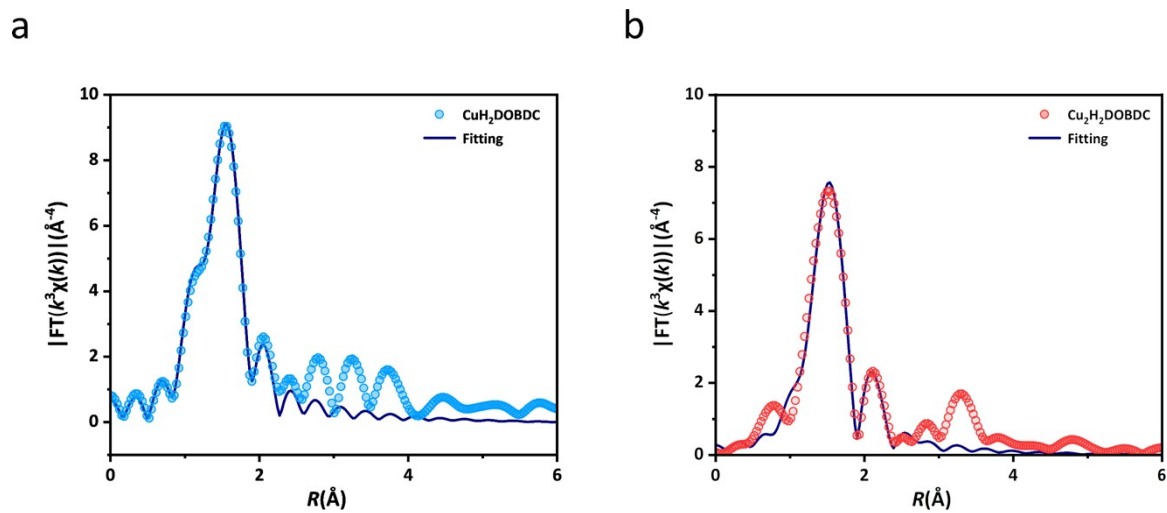

Figure S8. EXAFS fitting results of FT-EXAFS spectra at the Cu K-edge of (a) CuH<sub>2</sub>DOBDC, (b) Cu<sub>2</sub>H<sub>2</sub>DOBDC at the R spaces.



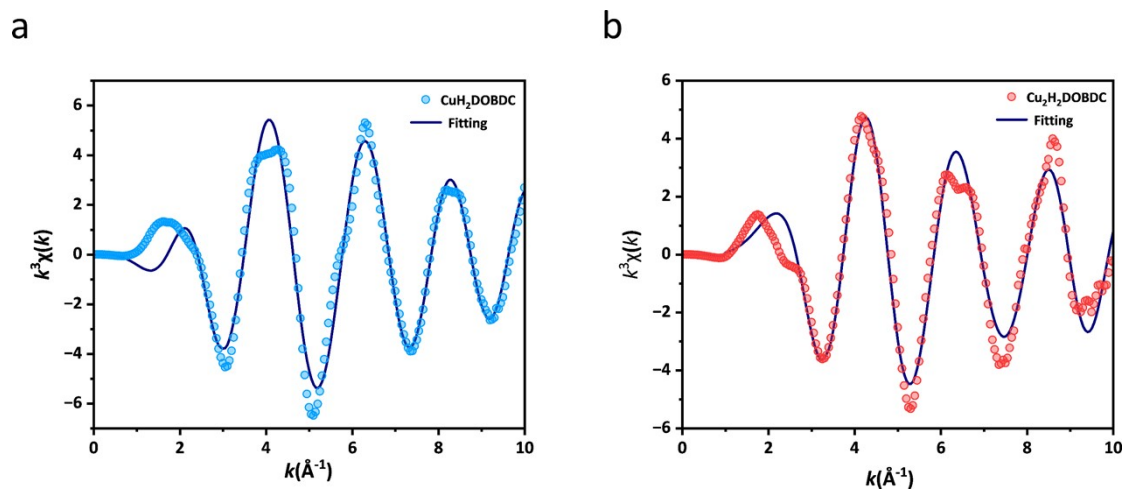

Figure S9. EXAFS fitting results of FT-EXAFS spectra at the Cu K-edge of (a)  $\text{CuH}_2\text{DOBDC}$ , (b)  $\text{Cu}_2\text{H}_2\text{DOBDC}$  at the K spaces.

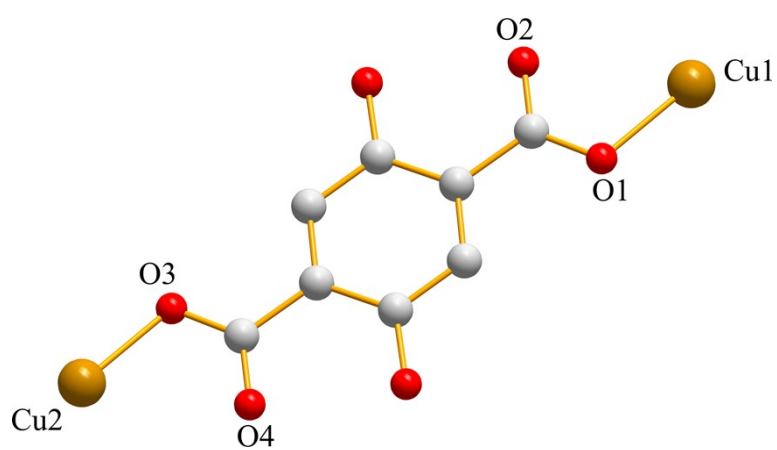

Figure S10. Speculation on the local structure of  $\text{Cu}_2\text{H}_2\text{DOBDC}$ .

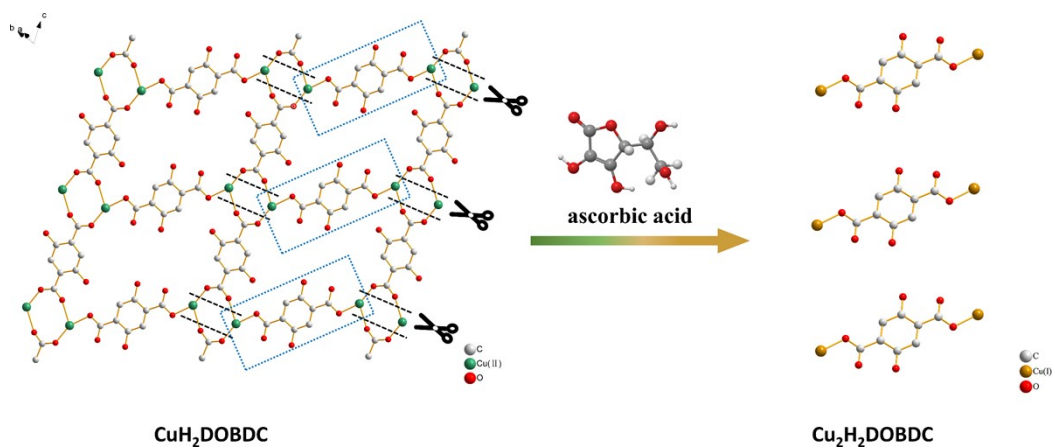

**Figure S11.** Possible formation process of  $\text{Cu}_2\text{H}_2\text{DOBDC}$  local structure.

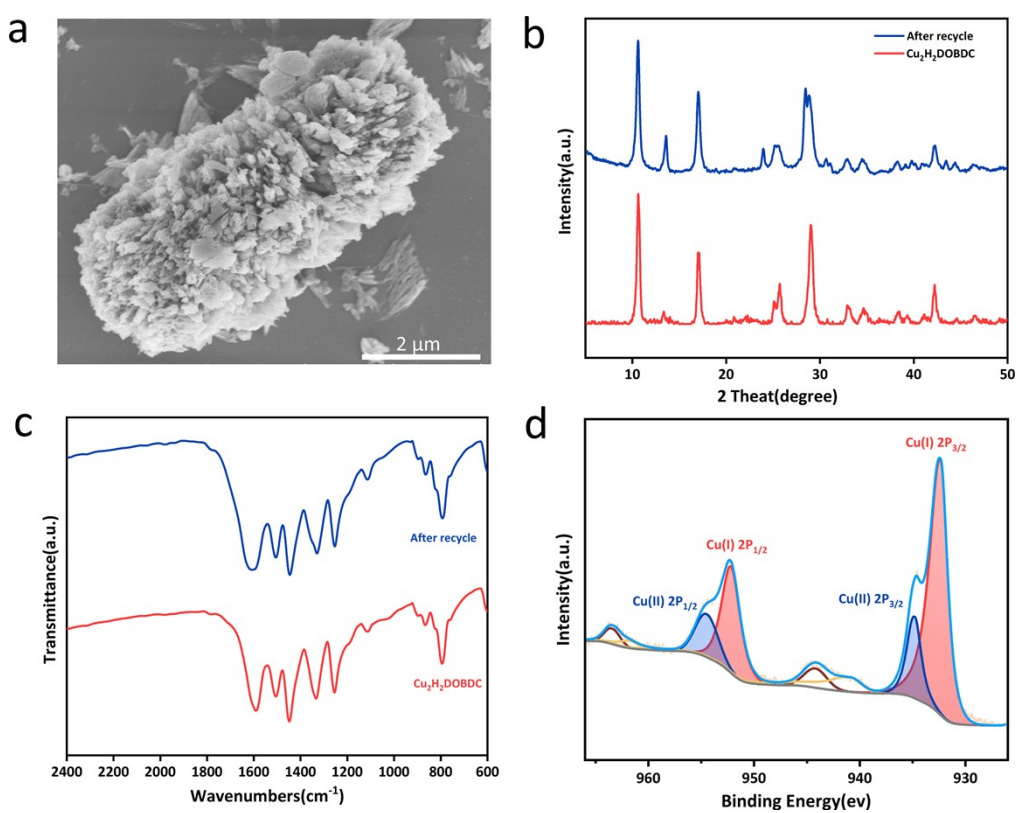

**Figure S12.**  $\text{Cu}_2\text{H}_2\text{DOBDC}$  after five cycles recycle. (a) SEM images. (b) XRD patterns. (c) FTIR spectra. (d) XPS spectra for Cu 2p.

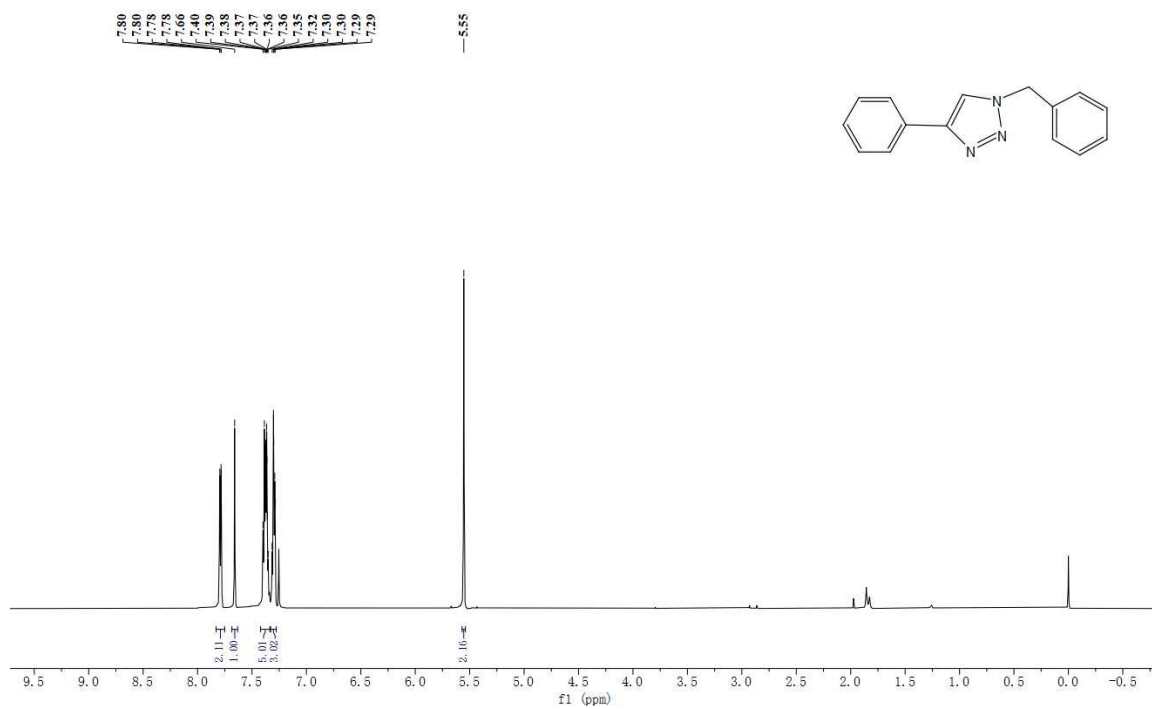

**Figure S13.** <sup>1</sup>H NMR (600 MHz, CDCl<sub>3</sub>) for 1-benzyl-4-phenyl-1H-1,2,3-triazole: δ 7.83 - 7.75 (m, 2H), 7.66 (s, 1H), 7.42 - 7.34 (m, 5H), 7.33 - 7.28 (m, 3H), 5.55 (s, 2H).

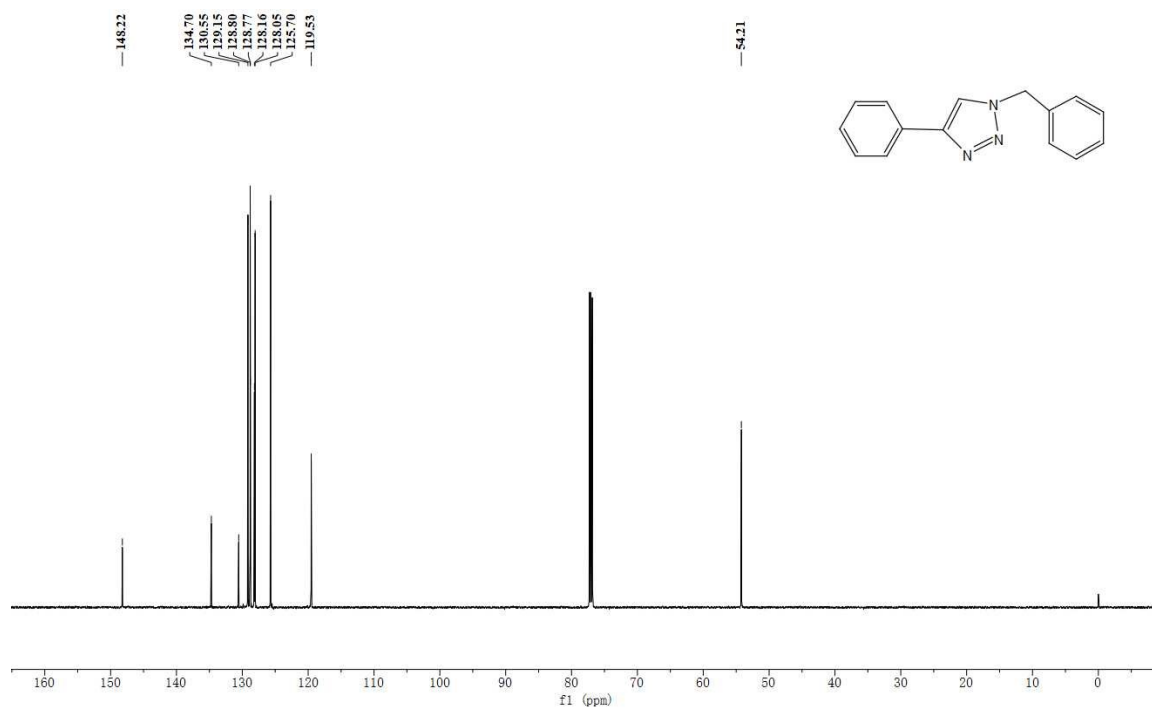

**Figure S14.** <sup>13</sup>C NMR (151 MHz, CDCl<sub>3</sub>) for 1-benzyl-4-phenyl-1H-1,2,3-triazole: δ 148.22, 134.70, 130.55, 129.15, 128.80, 128.77, 128.16, 128.05, 125.70, 119.53, 54.21.

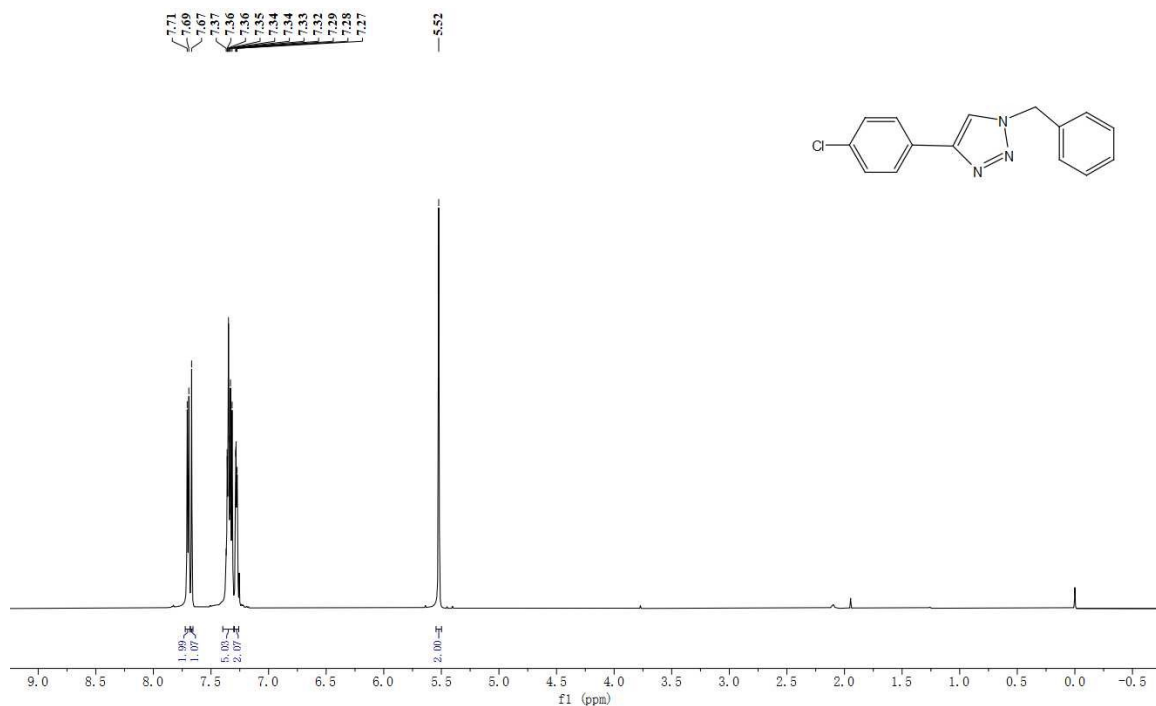

**Figure S15.** <sup>1</sup>H NMR (600 MHz, CDCl<sub>3</sub>) for 1-benzyl-4-(4-chlorophenyl)-1H-1,2,3-triazole: δ 7.70(d, 2H), 7.67 (s, 1H), 7.40 - 7.30 (m, 5H), 7.30 - 7.26 (m, 2H), 5.52 (s, 2H).

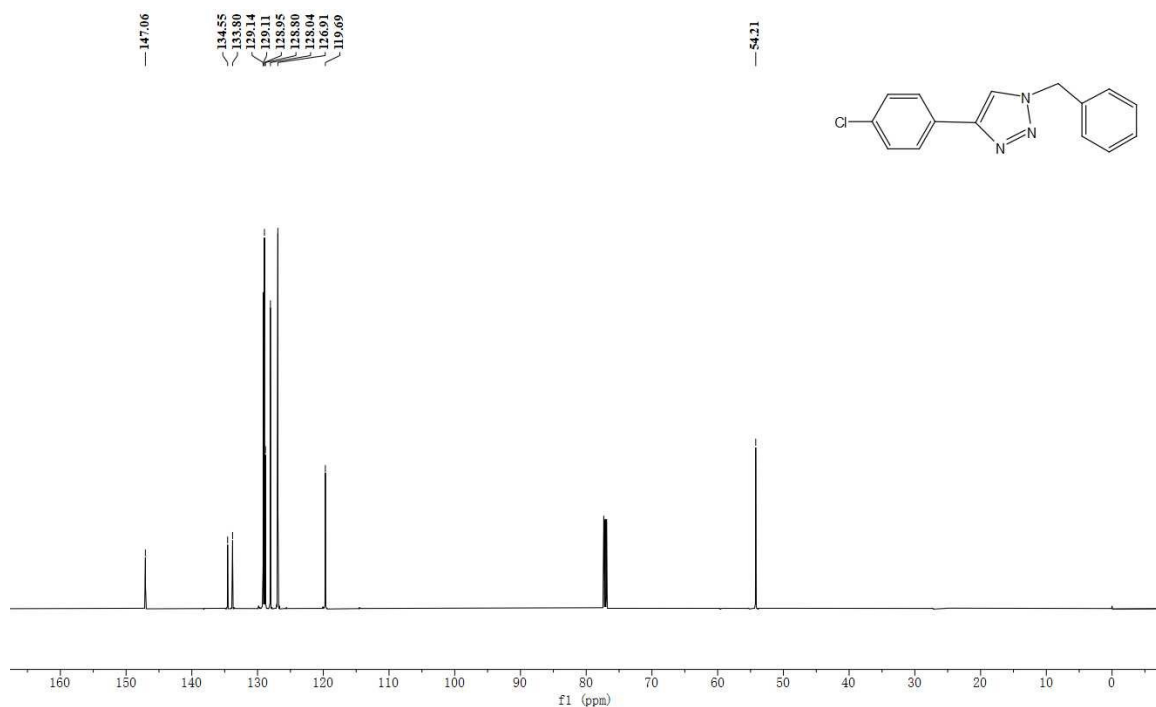

**Figure S16.** <sup>13</sup>C NMR (151 MHz, CDCl<sub>3</sub>) for 1-benzyl-4-(4-chlorophenyl)-1H-1,2,3-triazole: δ 147.06, 134.55, 133.80, 129.14, 129.11, 128.95, 128.80, 128.04, 126.91, 119.69, 54.21.



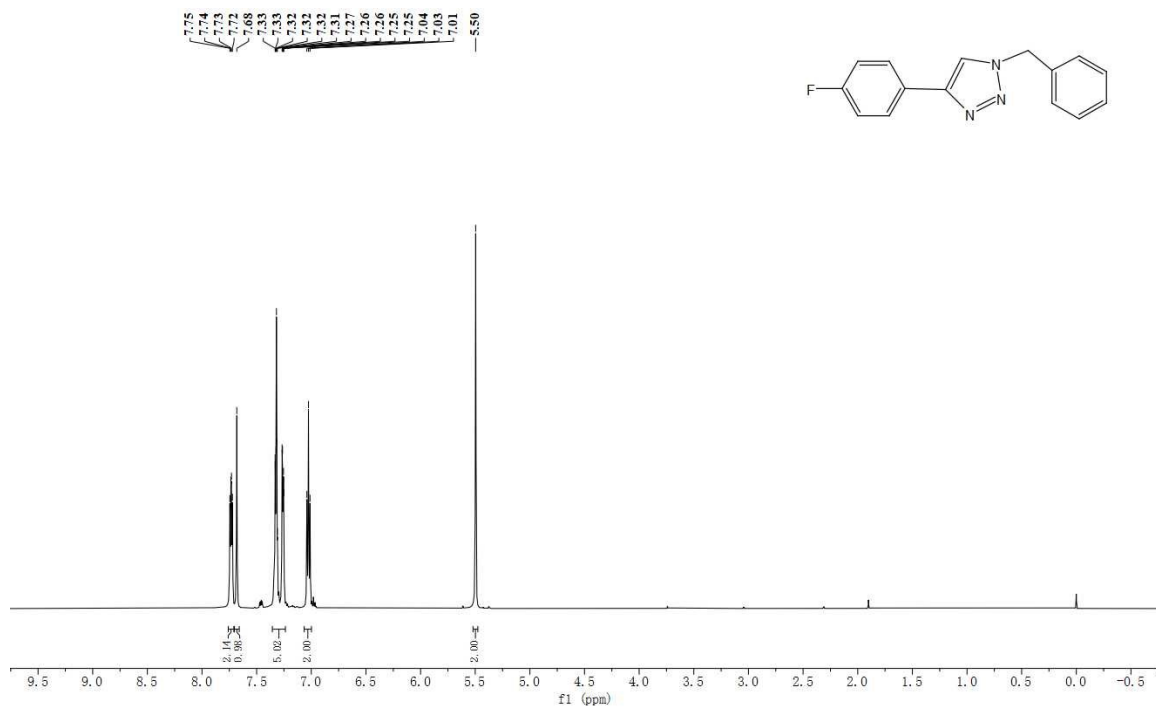

**Figure S19.** <sup>1</sup>H NMR (600 MHz, CDCl<sub>3</sub>) for 1-benzyl-4-(4-fluorophenyl)-1H-1,2,3-triazole: δ 7.75 - 7.72 (m, 2H), 7.68 (s, 1H), 7.33 - 7.25 (m, 5H), 7.04 - 7.01 (m, 2H), 5.50 (s, 2H).

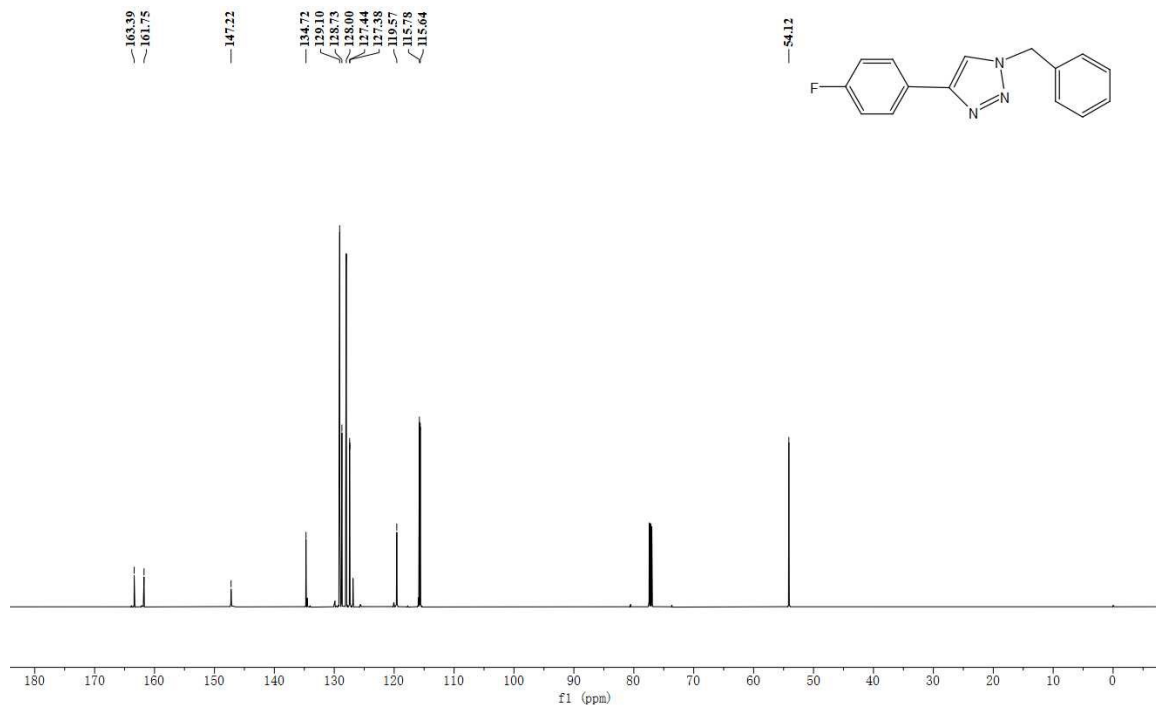

**Figure S20.** <sup>13</sup>C NMR (151 MHz, CDCl<sub>3</sub>) for 1-benzyl-4-(4-fluorophenyl)-1H-1,2,3-triazole: δ 163.39, 161.75, 147.22, 134.72, 129.10, 128.73, 128.00, 127.44, 127.38, 119.57, 115.78, 115.64, 54.12.

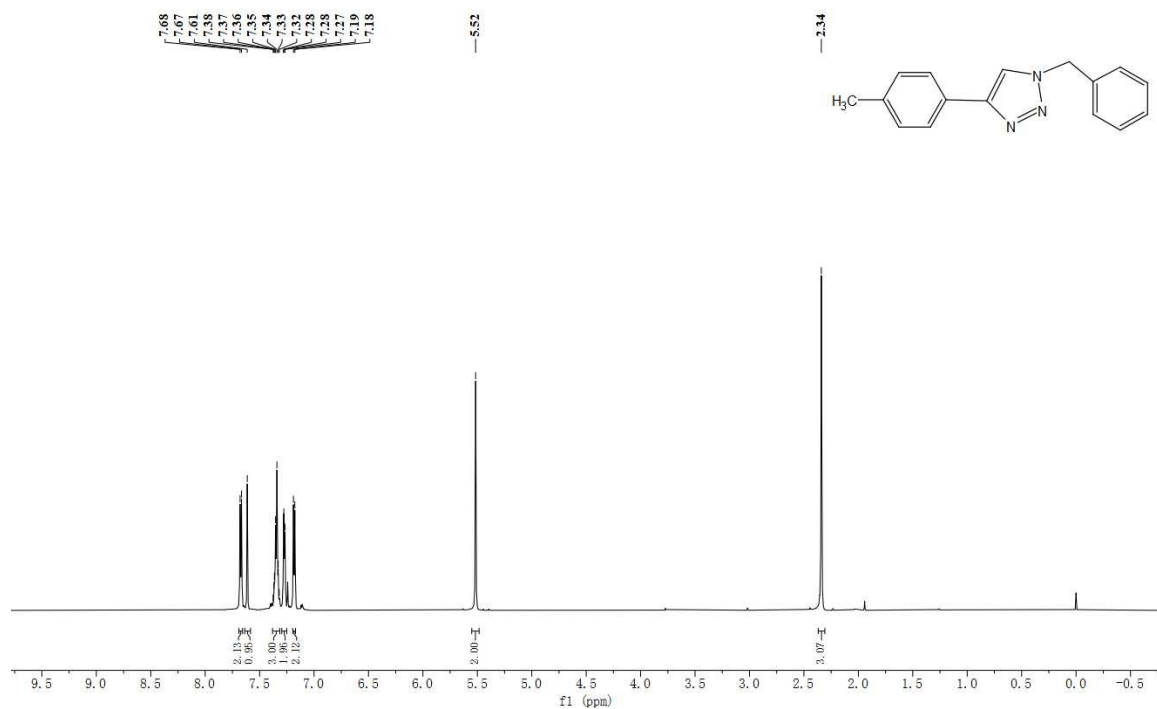

**Figure S21.** <sup>1</sup>H NMR (600 MHz, CDCl<sub>3</sub>) for 1-benzyl-4-(p-tolyl)-1H-1,2,3-triazole: δ 7.67 (d, 2H), 7.61 (s, 1H), 7.38 - 7.32 (m, 3H), 7.28 - 7.27 (m, 2H), 7.18 (d, 2H), 5.52 (s, 2H), 2.34 (s, 3H).

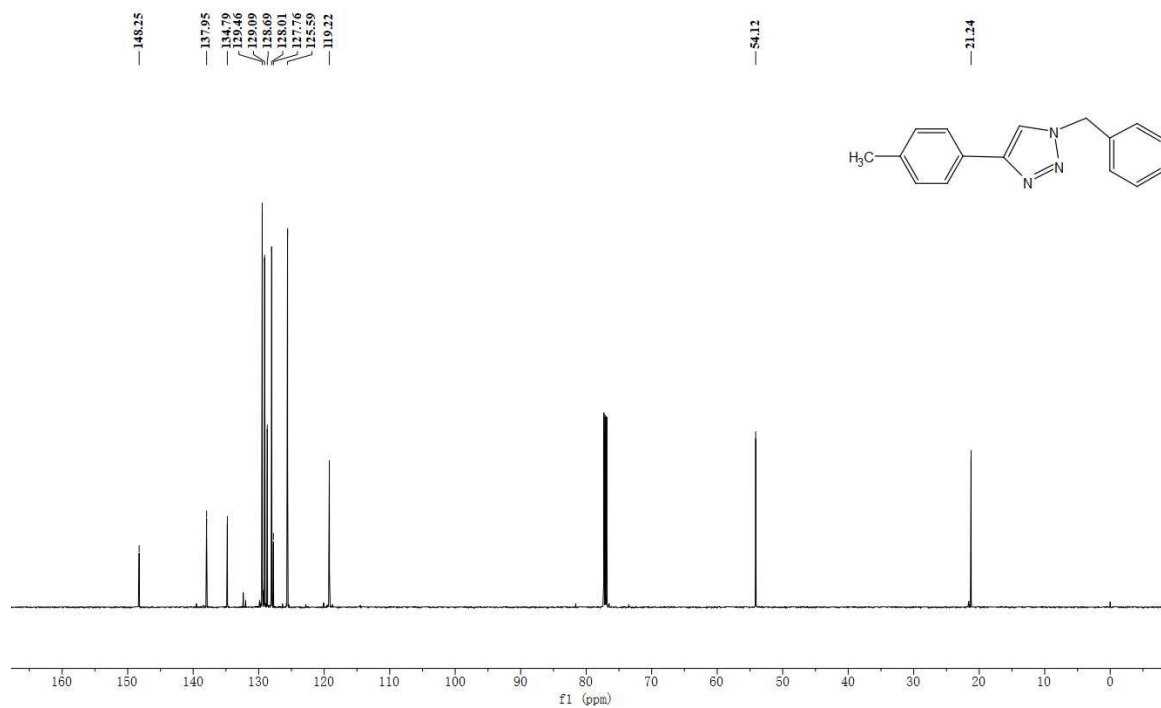

**Figure S22.** <sup>13</sup>C NMR (151 MHz, CDCl<sub>3</sub>) for 1-benzyl-4-(p-tolyl)-1H-1,2,3-triazole: δ 148.25, 137.95, 134.79, 129.46, 129.09, 128.69, 128.01, 127.76, 125.59, 119.22, 54.12, 21.24.

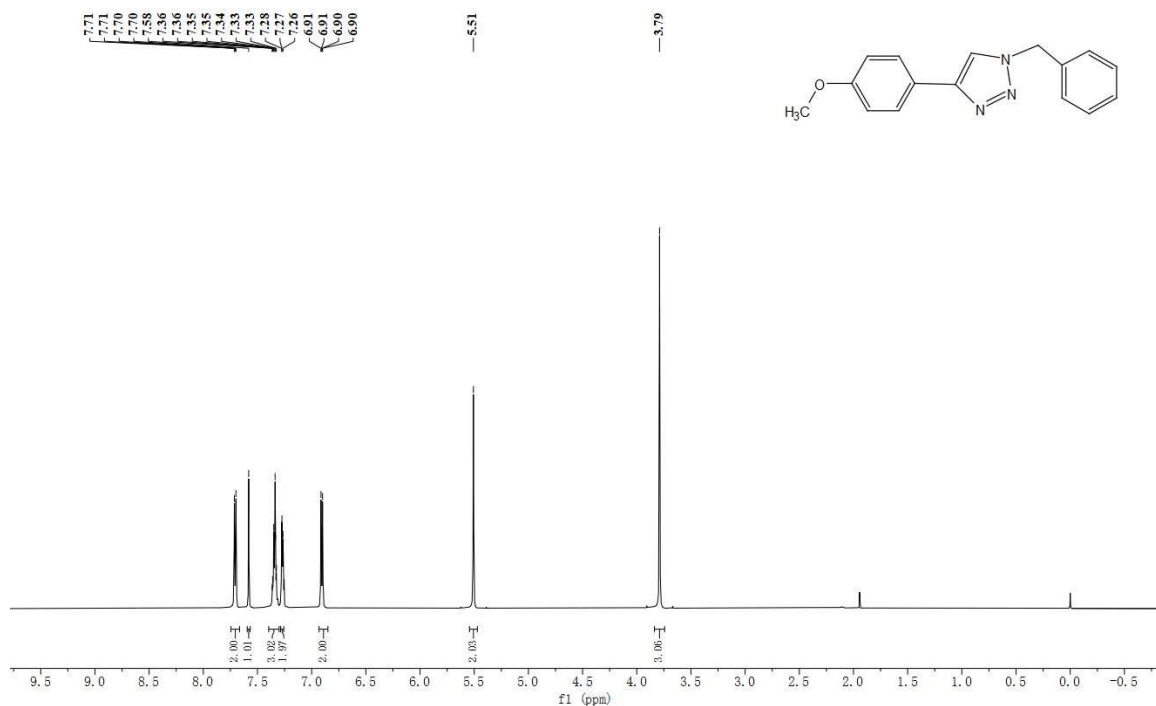

**Figure S23.** <sup>1</sup>H NMR (600 MHz, CDCl<sub>3</sub>) for 1-benzyl-4-(4-methoxyphenyl)-1H-1,2,3-triazole: δ 7.74 - 7.66 (m, 2H), 7.58 (s, 1H), 7.36 - 7.33 (m, 3H), 7.29 - 7.26 (m, 2H), 6.93 - 6.85 (m, 2H), 5.51 (s, 2H), 3.79 (s, 3H).

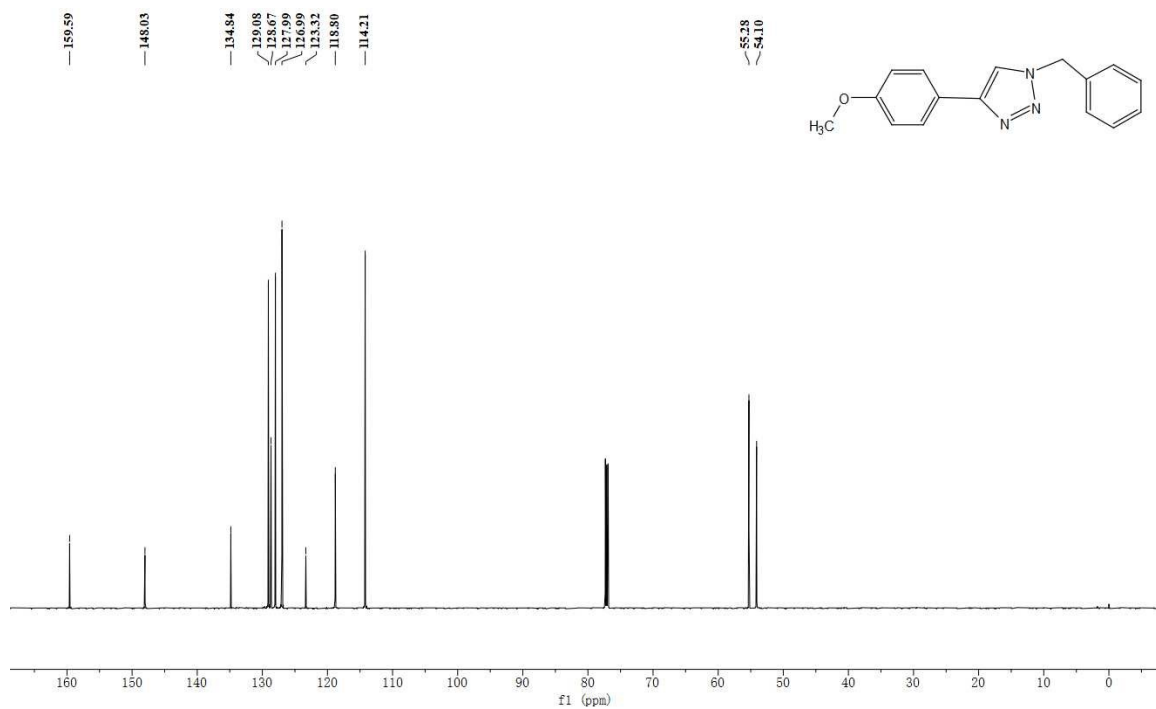

**Figure S24.** <sup>13</sup>C NMR (151 MHz, CDCl<sub>3</sub>) for 1-benzyl-4-(4-methoxyphenyl)-1H-1,2,3-triazole: δ 159.59, 148.03, 134.84, 129.08, 128.67, 127.99, 126.99, 123.32, 118.80, 114.21, 55.28, 54.10.



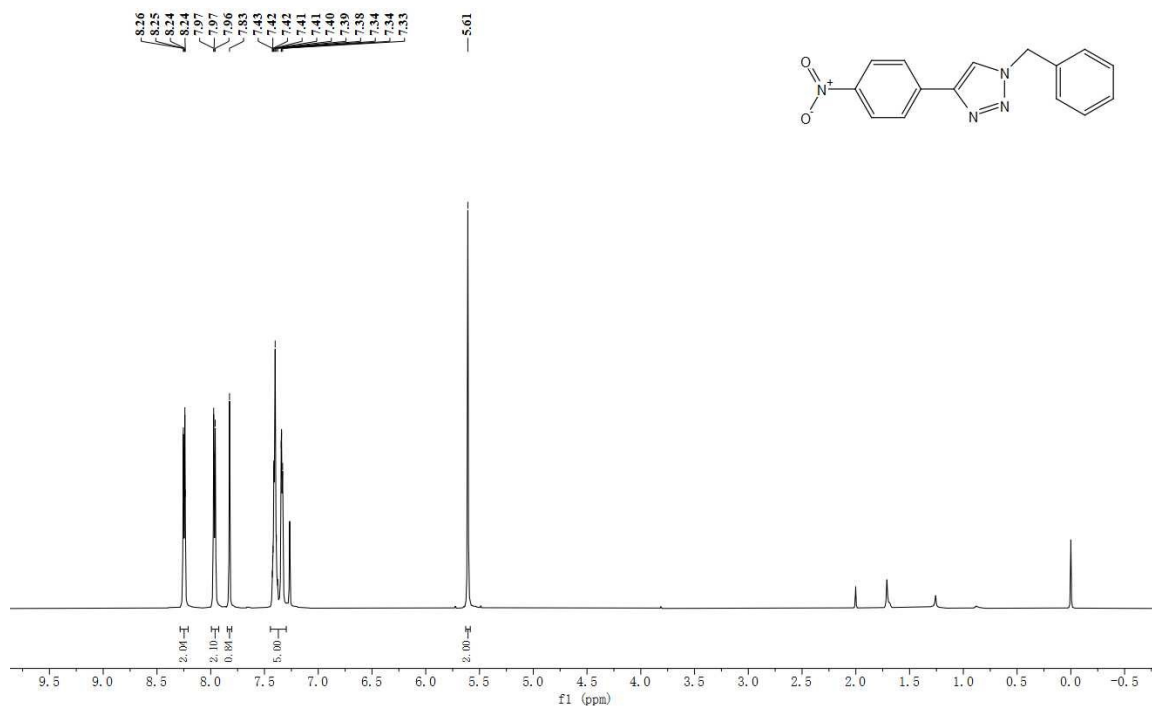

**Figure S25.** <sup>1</sup>H NMR (600 MHz, CDCl<sub>3</sub>) for 1-benzyl-4-(4-nitrophenyl)-1H-1,2,3-triazole: δ 8.25 (d, 2H), 7.99 - 7.92 (m, 2H), 7.83 (s, 1H), 7.44 - 7.30 (m, 5H), 5.61 (s, 2H).

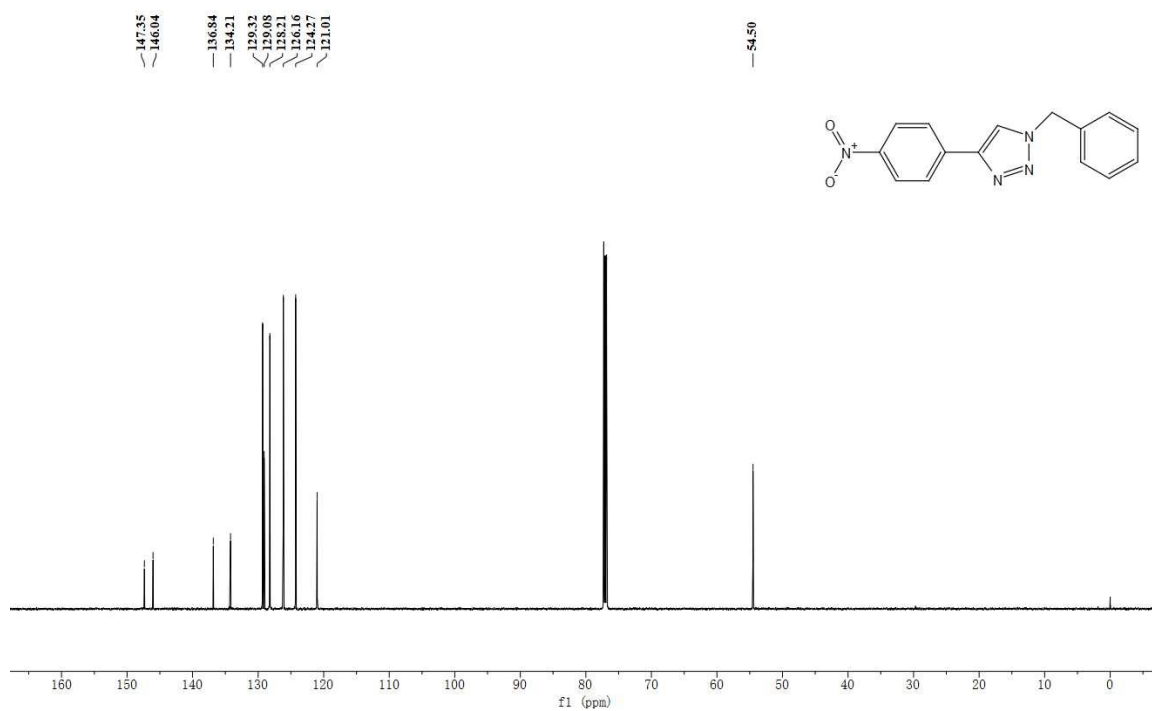

**Figure S26.** <sup>13</sup>C NMR (151 MHz, CDCl<sub>3</sub>) for 1-benzyl-4-(4-nitrophenyl)-1H-1,2,3-triazole: δ 147.35, 146.04, 136.84, 134.21, 129.32, 129.08, 128.21, 126.16, 124.27, 121.01, 54.50.

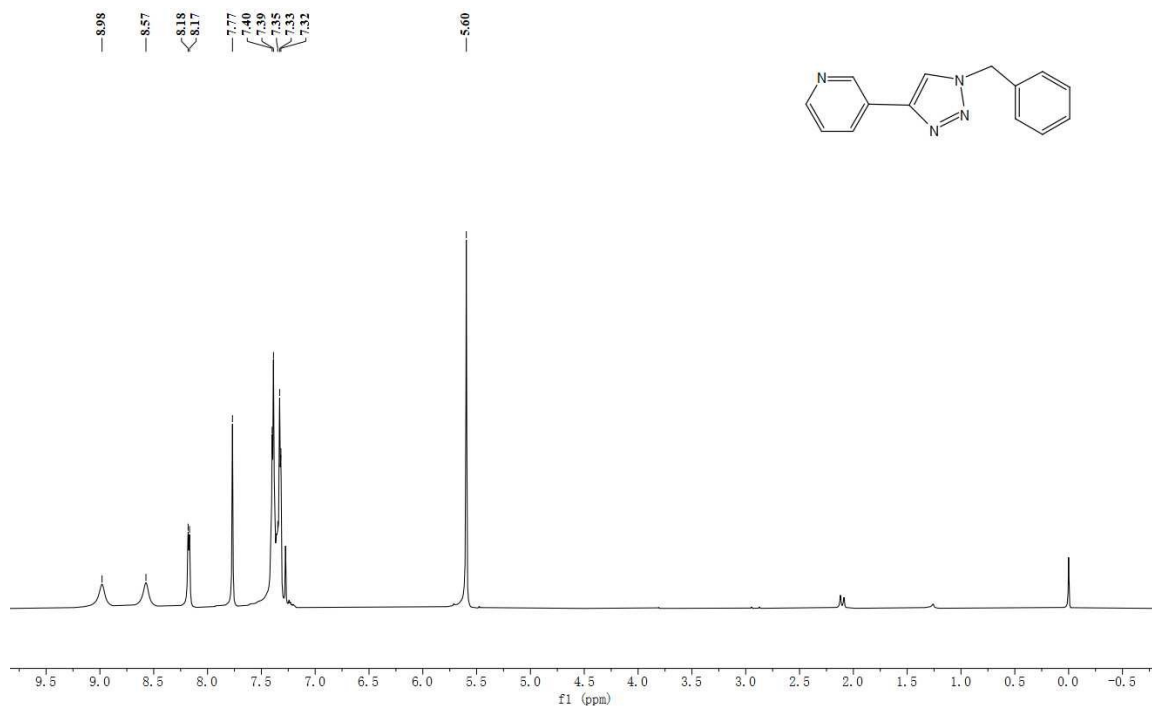

**Figure S27.**  $^1\text{H}$  NMR (600 MHz,  $\text{CDCl}_3$ ) for 3-(1-benzyl-1*H*-1,2,3-triazol-4-yl)pyridine:  $\delta$  8.98 (s, 1H), 8.57 (s, 1H), 8.17 (d, 1H), 7.77 (s, 1H), 7.43 - 7.30 (m, 6H), 5.60 (s, 2H).

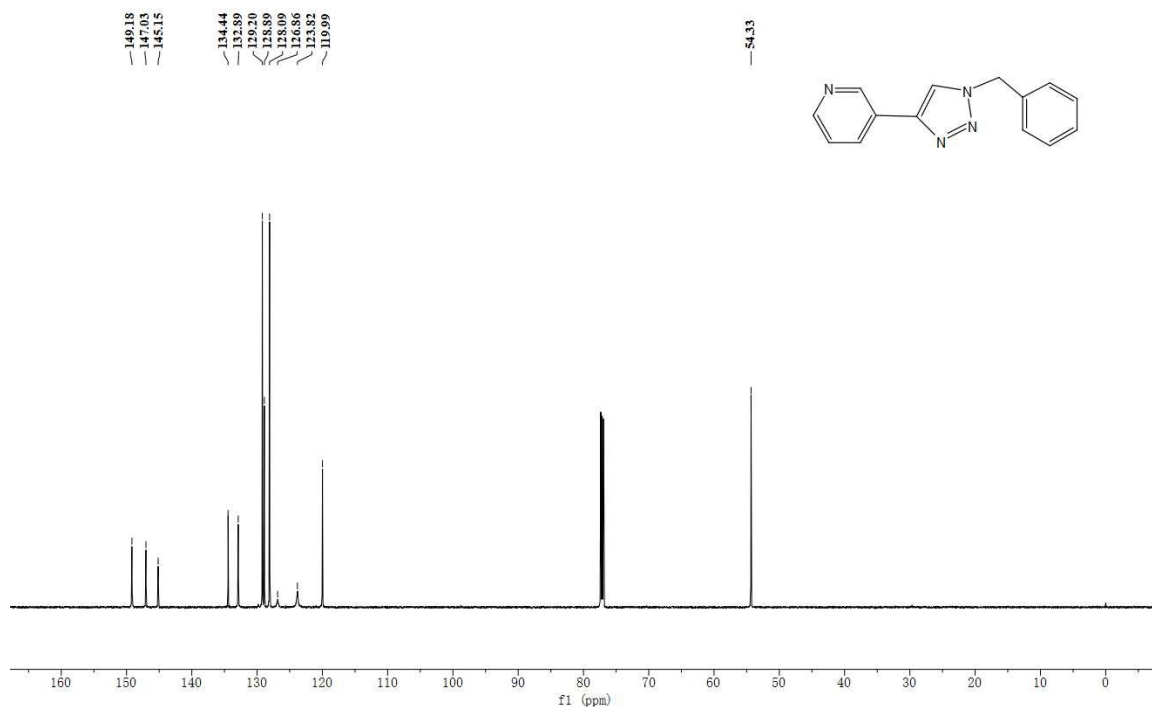

**Figure S28.**  $^{13}\text{C}$  NMR (151 MHz,  $\text{CDCl}_3$ ) for 3-(1-benzyl-1*H*-1,2,3-triazol-4-yl)pyridine:  $\delta$  149.18, 147.03, 145.15, 134.44, 132.89, 129.20, 128.89, 128.09, 126.86, 123.82, 119.99, 54.33.

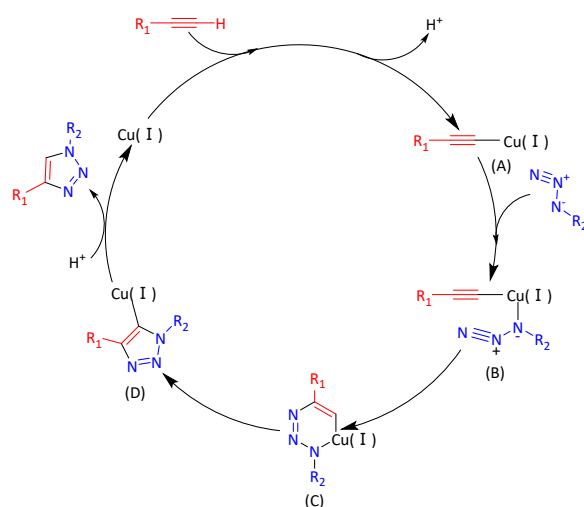

**Figure S29.** Proposed Catalytic Mechanism for the CuAAC Reaction with Cu<sub>2</sub>H<sub>2</sub>DOBDC as a catalyst.

**Table S1.** ICP results of CuH<sub>2</sub>DOBDC and Cu<sub>2</sub>H<sub>2</sub>DOBDC

| Sample                               | Cu%  |
|--------------------------------------|------|
| CuH <sub>2</sub> DOBDC               | 13.8 |
| Cu <sub>2</sub> H <sub>2</sub> DOBDC | 36.1 |

**Table S2.** EXAFS fitting parameters at the Cu K-edge of CuH<sub>2</sub>DOBDC and Cu<sub>2</sub>H<sub>2</sub>DOBDC.

| Sample                               | Path | N <sup>a</sup> | R(Å) <sup>b</sup> | σ <sup>2</sup> (Å <sup>2</sup> ) <sup>c</sup> | ΔE <sub>0</sub> (eV) <sup>d</sup> | R factor |
|--------------------------------------|------|----------------|-------------------|-----------------------------------------------|-----------------------------------|----------|
| CuH <sub>2</sub> DOBDC               | Cu-O | 6.21 ± 0.69    | 1.96 ± 0.012      | 0.008 ± 0.001                                 | 0.43 ± 1.56                       | 0.0036   |
| Cu <sub>2</sub> H <sub>2</sub> DOBDC | Cu-O | 4.01 ± 0.68    | 1.94 ± 0.015      | 0.006 ± 0.002                                 | 3.58 ± 2.04                       | 0.0047   |

EXAFS fitting parameters at the Cu K-edge for various samples. ( $S_0^2 = 1.0$ )

<sup>a</sup>N : coordination numbers; <sup>b</sup>R : bond distance; <sup>c</sup>σ<sup>2</sup> : Debye-Waller factors; <sup>d</sup>ΔE<sub>0</sub> : the inner potential correction. R factor: goodness of fit.  $S_0^2$  was set to 1.0, according to the experimental EXAFS fit of Cu foil reference by fixing CN as the known crystallographic value;

δ: percentage.

**Table S3** Optimization of the reaction conditions for the catalytic reactions of benzyl azide with phenylacetylene<sup>a</sup>

| Entry | Catalyst                             | Amount (mg) | Temperature(°C) | Yield(%) <sup>b</sup> |
|-------|--------------------------------------|-------------|-----------------|-----------------------|
| 1     | Cu <sub>2</sub> H <sub>2</sub> DOBDC | 10          | RT              | 26                    |
| 2     | Cu <sub>2</sub> H <sub>2</sub> DOBDC | 10          | 60              | 74                    |
| 3     | Cu <sub>2</sub> H <sub>2</sub> DOBDC | 10          | 80              | 99                    |
| 4     | Cu <sub>2</sub> H <sub>2</sub> DOBDC | 5           | 80              | 79                    |
| 5     | CuH <sub>2</sub> DOBDC               | 10          | 80              | 39                    |
| 6     | No catalyst                          | 0           | 80              | 19                    |

<sup>a</sup>Reaction conditions: benzyl azide (1 mmol), phenylacetylene (2 mmol), amyl acetate (1 mmol), acetonitrile (4 ml) and reaction time (2.5 h). <sup>b</sup>Isolated yields were calculated by GC and the amyl acetate was employed as the internal standard.

**Table S4** Summary of the previously reported Cu-based catalysts and the Cu<sub>2</sub>H<sub>2</sub>DOBDC catalyst for the Azide-Alkyne "Click" Reaction.

| Catalyst                                                                                           | Reaction Conditions | Yield | Reference |
|----------------------------------------------------------------------------------------------------|---------------------|-------|-----------|
| Cu <sub>2</sub> H <sub>2</sub> DOBDC                                                               | 80°C, 2.5 h         | 99%   | This Work |
| [Cu <sub>4</sub> (SiW <sub>12</sub> O <sub>40</sub> )(L)]·6H <sub>2</sub> O·2DMF                   | 80°C, 24 h          | 99%   | 6         |
| DE-CuBTC (CuICuII-BTC)                                                                             | 70°C, 6 h           | 100%  | 7         |
| Cu <sub>3</sub> (Br) <sub>3</sub> (L)                                                              | 70°C, 8 h           | >99%  | 8         |
| Cu <sub>1</sub> /NC-800                                                                            | RT, 12 h            | >99%  | 9         |
| [Cu <sub>4</sub> Cl <sub>4</sub> L]·CH <sub>3</sub> OH·1.5H <sub>2</sub> O                         | 60°C, 8 h           | 99%   | 10        |
| Cu <sub>4</sub> (SiW <sub>12</sub> O <sub>40</sub> )(L) <sub>2</sub> (DMF) <sub>2</sub> ·2EtOH·DMF | 80°C, 12 h          | 99%   | 11        |
| saCu-2@mpgC <sub>3</sub> N <sub>4</sub>                                                            | 130°C, 0.5 h        | 45%   | 12        |
| Cu(I)-containing MONPs                                                                             | 50°C, 24 h          | >99%  | 13        |
| Cu(PTZ)(NSA) 0.5·H <sub>2</sub> O                                                                  | 50°C, 2.5 h         | 94%   | 14        |
| [2Cu(L)(A)·3H <sub>2</sub> O] <sub>n</sub>                                                         | 80°C, 24 h          | >99%  | 15        |

## References

- 1 L. Valenzano, B. Civalieri, S. Chavan, S. Bordiga, M. H. Nilsen, S. Jakobsen, K. P. Lillerud and C. Lamberti, Disclosing the Complex Structure of UiO-66 Metal Organic Framework: A Synergic Combination of Experiment and Theory, *Chem. Mater.*, 2011, **23**, 1700-1718.
- 2 X. Zhou, J. Dong, Y. Zhu, L. Liu, Y. Jiao, H. Li, Y. Han, K. Davey, Q. Xu, Y. Zheng and S. Z. Qiao, Molecular Scalpel to Chemically Cleave Metal-Organic Frameworks for Induced Phase Transition, *J. Am. Chem. Soc.*, 2021, **143**, 6681-6690.
- 3 L. Shao, F. Q. Fan, X. Y. Dai, H. X. Fu, W. Z. Li, W. Qi, F. B. Meng and Y. Fu, Pseudomorphic Replacement in the Transformation between Metal-Organic Frameworks toward Three-Dimensional Hierarchical Nanostructures, *Chem. Mater.*, 2022, **34**, 5356-5365.
- 4 C. Huang, J. Dong, W. Sun, Z. Xue, J. Ma, L. Zheng, C. Liu, X. Li, K. Zhou, X. Qiao, Q. Song, W. Ma, L. Zhang, Z. Lin and T. Wang, Coordination mode engineering in stacked-nanosheet metal-organic frameworks to enhance catalytic reactivity and structural robustness, *Nat. Commun.*, 2019, **10**, 2779.
- 5 S. Shetty and R. A. van Santen, CO as an IR probe molecule for characterization of copper ions in a basolite C300 MOF sample, *Phys. Chem. Chem. Phys.*, 2010, **12**, 6330-6332.
- 6 B.-B. Lu, J. Yang, G.-B. Che, W.-Y. Pei and J.-F. Ma, Highly Stable Copper(I)-Based Metal-Organic Framework Assembled with Resorcin[4]arene and Polyoxometalate for Efficient Heterogeneous Catalysis of Azide-Alkyne "Click" Reaction, *ACS Appl. Mater. Interfaces*, 2018, **10**, 2628-2636.
- 7 Z. Fan, Z. Wang, M. Cokoja and R. A. Fischer, Defect engineering: an effective tool for enhancing the catalytic performance of copper-MOFs for the click reaction and the A<sup>3</sup> coupling, *Catal. Sci. Technol.*, 2021, **11**, 2396-2402.
- 8 J. F. Li, P. Du, Y. Y. Liu, G. H. Xu and J. F. Ma, Three thiacalix[4]arene-based Cu(I) coordination polymers: catalytic activities for azide-alkyne cycloaddition reactions and luminescence properties, *Dalton Trans.*, 2020, **49**, 3715-3722.
- 9 P. Ren, Q. Li, T. Song, Z. Wang, K. Motokura and Y. Yang, Highly Efficient and Stable Atomically Dispersed Cu Catalyst for Azide-Alkyne Cycloaddition Reaction, *ChemCatChem*, 2021, **13**, 3960-3966.
- 10 X. X. Wang, J. Yang, X. Xu and J. F. Ma, Highly Stable Copper(I)-Thiacalix[4]arene-Based Frameworks for Highly Efficient Catalysis of Click Reactions in Water, *Chemistry*, 2019, **25**, 16660-16667.
- 11 M. Y. Yu, T. T. Guo, X. C. Shi, J. Yang, X. Xu, J. F. Ma and Z. T. Yu, Polyoxometalate-Bridged Cu(I)- and Ag(I)-Thiacalix[4]arene Dimers for Heterogeneous Catalytic Oxidative Desulfurization and Azide-Alkyne "Click" Reaction, *Inorg. Chem.*, 2019, **58**, 11010-11019.
- 12 G. Vilé, G. Di Liberto, S. Tosoni, A. Sivo, V. Ruta, M. Nachtegaal, A. H. Clark, S. Agnoli, Y. Zou, A. Savateev, M. Antonietti and G. Pacchioni, Azide-Alkyne Click Chemistry over a Heterogeneous Copper-Based Single-Atom Catalyst, *ACS Catal.*, 2022, **12**, 2947-2958.
- 13 Y. Bai, X. Feng, H. Xing, Y. Xu, B. K. Kim, N. Baig, T. Zhou, A. A. Gewirth, Y. Lu, E. Oldfield and S. C. Zimmerman, A Highly Efficient Single-Chain Metal-Organic Nanoparticle Catalyst for Alkyne-Azide "Click" Reactions in Water and in Cells, *J. Am. Chem. Soc.*, 2016, **138**, 11077-11080.
- 14 P. Li, S. Regati, H. Huang, H. D. Arman, J. C. G. Zhao and B. Chen, A metal-organic framework as a highly efficient and reusable catalyst for the solvent-free 1,3-dipolar cycloaddition of organic azides to alkynes, *Inorg. Chem. Front.*, 2015, **2**, 42-46.
- 15 K. Huang, Q. Li, X.-Y. Zhang, D.-B. Qin and B. Zhao, Copper-Cluster-Based MOF as a Heterogeneous Catalyst for CO<sub>2</sub> Chemical Fixation and Azide-Alkyne Cycloaddition, *Cryst. Growth Des.*, 2022, **22**, 6531-6538.
